# Supplementary material for: Ag2[TeO2(OH)4]: a nonlinear optical tellurate with balanced comprehensive performance
Source: Royal Society of Chemistry journal article supplement (doi:10.1039/d4tc02218a), 2024-01-01
Supplement: d4tc02218a1.pdf [file d4tc02218a1.pdf]

## Supporting Information

### **Ag<sub>2</sub>[TeO<sub>2</sub>(OH)<sub>4</sub>]: A Nonlinear Optical Tellurate with Balanced Comprehensive Performance**

Wenjing Tan, Xuefan Wang, Ruqing Wei, Hongbo Huang, Daqing Yang, Ying Wang, and Bingbing Zhang\*

**Table S1.** Space group, synthetic method, basic building blocks (BBBs) of anions, and connection methods of the anionic group of the material containing TeO<sub>6-x</sub>(OH)<sub>x</sub> (x=1-6) anionic group.

| Material                                                                                                                                          | Space group             | Synthetic method                        | BBBs of anions                                            | Connection | Ref. |
|---------------------------------------------------------------------------------------------------------------------------------------------------|-------------------------|-----------------------------------------|-----------------------------------------------------------|------------|------|
| H <sub>6</sub> TeO <sub>6</sub>                                                                                                                   | <i>F4<sub>1</sub>32</i> | Aqueous solution                        | Te(OH) <sub>6</sub>                                       | Isolated   | 1    |
| KIO <sub>3</sub> ·Te(OH) <sub>6</sub>                                                                                                             | <i>Pna2<sub>1</sub></i> | Aqueous solution                        | Te(OH) <sub>6</sub>                                       | Isolated   | 2    |
| Te(OH) <sub>6</sub> ·(NH <sub>4</sub> ) <sub>2</sub> SO <sub>4</sub>                                                                              | <i>Cc</i>               | Aqueous solution                        | Te(OH) <sub>6</sub>                                       | Isolated   | 3    |
| K <sub>2</sub> SeO <sub>4</sub> ·Te(OH) <sub>6</sub>                                                                                              | <i>Cc</i>               | Aqueous solution                        | Te(OH) <sub>6</sub>                                       | Isolated   | 4    |
| Na <sub>2</sub> SeO <sub>4</sub> ·Te(OH) <sub>6</sub> ·H <sub>2</sub> O                                                                           | <i>P2<sub>1</sub>/c</i> | Aqueous solution                        | Te(OH) <sub>6</sub>                                       | Isolated   | 5    |
| Cs <sub>2</sub> SO <sub>4</sub> ·Te(OH) <sub>6</sub>                                                                                              | <i>R3</i>               | Aqueous solution                        | Te(OH) <sub>6</sub>                                       | Isolated   | 6    |
| Cs <sub>2</sub> SeO <sub>4</sub> ·Te(OH) <sub>6</sub>                                                                                             | <i>P2<sub>1</sub>/c</i> | Aqueous solution                        | Te(OH) <sub>6</sub>                                       | Isolated   | 6    |
| Hg <sup>I</sup> <sub>2</sub> (H <sub>4</sub> Te <sup>VI</sup> O <sub>6</sub> )(H <sub>6</sub> Te <sup>VI</sup> O <sub>6</sub> )·2H <sub>2</sub> O | <i>P-1</i>              | Aqueous solution                        | Te(OH) <sub>6</sub><br>TeO <sub>2</sub> (OH) <sub>4</sub> | Isolated   | 7    |
| Na[TeO(OH) <sub>5</sub> ]                                                                                                                         | <i>P4<sub>2</sub>/n</i> | Aqueous solution                        | TeO(OH) <sub>5</sub>                                      | Isolated   | 8    |
| K[TeO(OH) <sub>5</sub> ]·H <sub>2</sub> O                                                                                                         | <i>P2<sub>1</sub>/c</i> | /                                       | TeO(OH) <sub>5</sub>                                      | Isolated   | 9    |
| Na <sub>2</sub> [TeO <sub>2</sub> (OH) <sub>4</sub> ]                                                                                             | <i>C2/c</i>             | Aqueous solution<br>Hydrothermal method | TeO <sub>2</sub> (OH) <sub>4</sub>                        | Isolated   | 8    |
| (NH <sub>4</sub> ) <sub>2</sub> TeO <sub>2</sub> (OH) <sub>4</sub>                                                                                | <i>C2/m</i>             | Hydrothermal method<br>(Unstable)       | TeO <sub>2</sub> (OH) <sub>4</sub>                        | Isolated   | 10   |

|                                                                                                    |          |                             |                                                                                        |                                                                            |                    |
|----------------------------------------------------------------------------------------------------|----------|-----------------------------|----------------------------------------------------------------------------------------|----------------------------------------------------------------------------|--------------------|
| $\text{Hg}^{\text{II}}(\text{H}_4\text{Te}^{\text{VI}}\text{O}_6)$                                 | $Pna2_1$ | Aqueous solution            | $\text{TeO}_2(\text{OH})_4$                                                            | Isolated                                                                   | 7                  |
| $\text{K}_2[\text{TeO}_2(\text{OH})_4]$                                                            | $P-1$    | Hydrothermal method         | $\text{TeO}_2(\text{OH})_4^{2-}$                                                       | Isolated                                                                   | 11                 |
| $\text{Ag}_2[\text{TeO}_2(\text{OH})_4]$                                                           | $Fdd2$   | Aqueous solution            | $\text{TeO}_2(\text{OH})_4^{2-}$                                                       | Isolated                                                                   | 12-13<br>This work |
| $\text{Cs}_2[\text{Te}_2\text{O}_{10}\text{H}_6][\text{Te}(\text{OH})_6]$                          | $P-1$    | Aqueous solution            | $\text{TeO}_3(\text{OH})_3$<br>$\text{Te}(\text{OH})_6$                                | Dimer; $[\text{Te}_2\text{O}_{10}\text{H}_6]^{2-}$<br>Isolated             | 14                 |
| $\text{Cs}_3[\text{Te}_2\text{O}_{10}\text{H}_5]\cdot 4\text{H}_2\text{O}$                         | $P-1$    | Aqueous solution            | $\text{TeO}_3(\text{OH})_3$<br>$\text{Te}(\text{OH})_6$                                | Dimer; $[\text{Te}_2\text{O}_{10}\text{H}_5]^{3-}$<br>Isolated             | 14                 |
| $\text{Cs}_4[\text{Te}_2\text{O}_{10}\text{H}_4]\cdot 8\text{H}_2\text{O}$                         | $P-1$    | Aqueous solution (Unstable) | $\text{TeO}_4(\text{OH})_2$                                                            | Dimer; $[\text{Te}_2\text{O}_{10}\text{H}_4]^{4-}$                         | 14                 |
| $\text{K}_4[\text{Te}_2\text{O}_{10}\text{H}_4]\cdot 8\text{H}_2\text{O}$                          | $C2/c$   | Aqueous solution (Unstable) | $\text{TeO}_4(\text{OH})_2$                                                            | Dimer; $[\text{Te}_2\text{O}_{10}\text{H}_4]^{4-}$                         | 14                 |
| $\text{K}_4[\text{Te}_2\text{O}_6(\text{OH})_4]\cdot 7.3\text{H}_2\text{O}$                        | $C2/c$   | Aqueous solution            | $\text{TeO}_4(\text{OH})_2$                                                            | Dimer; $[\text{Te}_2\text{O}_6(\text{OH})_4]^{4-}$                         | 15                 |
| $\text{KTeO}_3(\text{OH})$                                                                         | $P2_1/c$ | Aqueous solution            | $\text{TeO}_4(\text{OH})_2$                                                            | Chain; $[\text{TeO}_3(\text{OH})]_n^{n-}$                                  | 16                 |
| $\text{Rb}_4[\text{Te}_2\text{O}_{10}\text{H}_4]\cdot 10\text{H}_2\text{O}$                        | $P-1$    | Aqueous solution (Unstable) | $\text{TeO}_4(\text{OH})_2$                                                            | Dimer; $[\text{Te}_2\text{O}_{10}\text{H}_4]^{4-}$                         | 14                 |
| $\text{K}_2[\text{Te}_3\text{O}_8(\text{OH})_4]$                                                   | $Fdd2$   | Hydrothermal method         | $\text{TeO}_4(\text{OH})_2$<br>$\text{TeO}_5(\text{OH})$                               | Chain; $(\text{Te}_3\text{O}_{12})^{6-}$                                   | 17                 |
| $\text{K}_6[\text{Te}_2\text{O}_{10}\text{H}_4][\text{TeO}_6\text{H}_4]\cdot 12\text{H}_2\text{O}$ | $P-1$    | Aqueous solution (Unstable) | $\text{TeO}_4(\text{OH})_2$<br>$\text{TeO}_2(\text{OH})_4$<br>$\text{Te}(\text{OH})_6$ | Dimer; $[\text{Te}_2\text{O}_{10}\text{H}_4]^{4-}$<br>Isolated<br>Isolated | 14                 |
| $\text{K}_2[\text{Te}_4\text{O}_8(\text{OH})_{10}]$                                                | $P2_1/c$ | Hydrothermal method         | $\text{TeO}_4(\text{OH})_2$<br>$\text{TeO}_3(\text{OH})_3$                             | Tetramer; $[\text{Te}_4\text{O}_8(\text{OH})_{10}]^{2-}$                   | 18                 |
| $\text{Rb}[\text{Te}_2\text{O}_4(\text{OH})_5]$                                                    | $P2_1/c$ | Hydrothermal method         | $\text{TeO}_4(\text{OH})_2$<br>$\text{TeO}_3(\text{OH})_3$                             | Tetramer; $(\text{Te}_4\text{O}_{18}\text{H}_{10})^{2-}$                   | 17                 |
| $\text{Te}_2\text{O}_4(\text{OH})_2$                                                               | $Pna2_1$ | Hydrothermal method         | $\text{TeO}_4(\text{OH})_2$<br>$\text{TeO}_4$                                          | Chain; Te(VI) chain                                                        | 19                 |

|                                                     |             |                                |                              |                                    |    |
|-----------------------------------------------------|-------------|--------------------------------|------------------------------|------------------------------------|----|
| $K_{8.5}[Te_6O_{27}H_9] \cdot 0.5H_3O \cdot 17H_2O$ | <i>C2</i>   | Aqueous solution<br>(Unstable) | $TeO_4(OH)_2$<br>$TeO_5(OH)$ | Ring; $[Te_6O_{27}H_9]^{9-}$       | 14 |
| $NH_4TeO_3(OH)$                                     | <i>P-1</i>  | Hydrothermal method            | $TeO_4(OH)_2$                | Chain                              | 20 |
| $Na_4[Te_2O_6(OH)_4] \cdot 6H_2O$                   | <i>P-1</i>  | Aqueous solution               | $TeO_4(OH)_2$                | Dimer; $[Te_2O_6(OH)_4]^{4-}$      | 8  |
| $Na_2K_4[Te_2O_8(OH)_2](H_2O)_{14}$                 | <i>I2/m</i> | Aqueous solution               | $TeO_5(OH)$                  | Dimer; $[Te_2O_8(OH)_2]^{6-}$      | 21 |
| $NH_4[Te^{IV}Te^{VI}O_5(OH)]$                       | <i>Pnma</i> | Hydrothermal method            | $TeO_5(OH)$                  | Chain; $[Te^{IV}Te^{VI}O_5(OH)]^-$ | 22 |
| $Cs_2[Te_3O_8(OH)_4]$                               | <i>Fdd2</i> | Hydrothermal method            | $TeO_5(OH)$<br>$TeO_4(OH)_2$ | Chain; $[Te_3O_8(OH)_4]^{2-}$      | 23 |
| $K_2[Te_3O_8(OH)_4]$                                | <i>Fdd2</i> | Hydrothermal method            | $TeO_5(OH)$<br>$TeO_4(OH)_2$ | Chain; $[Te_3O_8(OH)_4]^{2-}$      | 17 |
| $Na_2[Te_3O_8(OH)_4]$                               | <i>Fdd2</i> | Hydrothermal method            | $TeO_5(OH)$<br>$TeO_4(OH)_2$ | Chain; $[Te_3O_8(OH)_4]^{2-}$      | 23 |
| $Rb_2[Te_3O_8(OH)_4]$                               | <i>Fdd2</i> | Hydrothermal method            | $TeO_5(OH)$<br>$TeO_4(OH)_2$ | Chain; $[Te_3O_8(OH)_4]^{2-}$      | 23 |
| $K_8Te_6O_{17}(OH)_{10} \cdot 1/2KOH \cdot 16H_2O$  | <i>C2</i>   | Aqueous solution<br>(Unstable) | $TeO_5(OH)$<br>$TeO_4(OH)_2$ | Ring; $[Te_6O_{17}(OH)_{10}]^{8-}$ | 24 |

**Figure S1.** UV-vis-NIR transmittance spectrum on a single crystal of  $\text{Ag}_2[\text{TeO}_2(\text{OH})_4]$ .

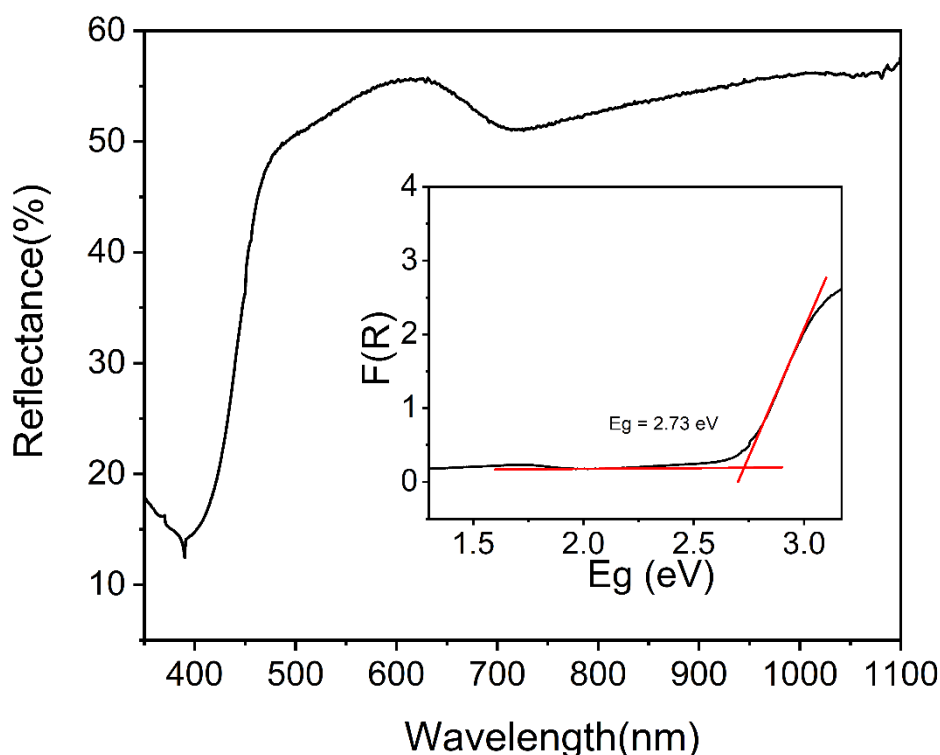

## REFERENCES

- (1) Zilber, R.; Durif, A.; Averbuch-Pouchot, M. T., Structure of potassium sulfate tellurate:  $\text{Te}(\text{OH})_6$ . *Acta Crystallogr B*. **1980**, *36* (11), 2743-2745.
- (2) Wu, H.; Yu, H.; Zhang, W.; Cantwell, J.; Poeppelmeier, K. R.; Pan, S.; Halasyamani, P. S., Crystal Growth and Linear and Nonlinear Optical Properties of  $\text{KIO}_3 \cdot \text{Te}(\text{OH})_6$ . *Cryst. Growth Des.* **2017**, *17* (8), 4405-4412.
- (3) Zilber, R.; Durif, A.; Averbuch-Pouchot, M. T., Structure of ammonium sulfate tellurate  $\text{Te}(\text{OH})_6 \cdot (\text{NH}_4)_2\text{SO}_4$ . *Acta Crystallogr B*. **1981**, *37* (3), 650-652. (37) Dammak, M.; Khemakhem, H.; Mhiri, T.; Kolsi, A. W.; Daoud, A., Structural and Vibrational Study of  $\text{K}_2\text{SeO}_4 \cdot \text{Te}(\text{OH})_6$  Material. *J. Solid State Chem.* **1999**, *145* (2), 612-618.
- (4) Dammak, M.; Litaïem, H.; Mhiri, T., Structural, thermal and dielectric studies in  $\text{Na}_2\text{SeO}_4 \cdot \text{Te}(\text{OH})_6 \cdot \text{H}_2\text{O}$ . *J. Alloys Compd.* **2006**, *416* (1), 228-235.
- (5) Dammak, M.; Mhiri, T.; Jaud, J.; Savariault, J. M., Structural study of the two new caesium sulfate and selenate tellurate  $\text{Cs}_2\text{SO}_4 \cdot \text{Te}(\text{OH})_6$  and  $\text{Cs}_2\text{SeO}_4 \cdot \text{Te}(\text{OH})_6$ . *Int. J. Inorg. Mater.* **2001**, *3* (7), 861-873.
- (6) Weil, M., Preparation and Crystal Structures of the Hydrous Mercury Tellurates,  $\text{Hg}^{\text{II}}(\text{H}_4\text{Te}^{\text{VI}}\text{O}_6)$  and  $\text{Hg}_2^{\text{II}}(\text{H}_4\text{Te}^{\text{VI}}\text{O}_6)(\text{H}_6\text{Te}^{\text{VI}}\text{O}_6) \cdot 2\text{H}_2\text{O}$ . *Z. Anorg. Allg. Chem.* **2004**, *630* (7), 1048-1053.
- (7) Weil, M.; Stöger, B.; Larvor, C.; Raih, I.; Gierl-Mayer, C., The Hydrous Sodium Oxotellurates(VI)  $\text{Na}[\text{TeO}(\text{OH})_5]$ ,  $\text{Na}_2[\text{TeO}_2(\text{OH})_4]$ ,  $\text{Na}_4[\text{Te}_2\text{O}_6(\text{OH})_4](\text{H}_2\text{O})_6$ , and a Third Polymorph of Anhydrous  $\text{Na}_2[\text{TeO}_4]$ . *Z. Anorg. Allg. Chem.* **2017**, *643* (23), 1888-1897.
- (8) Raman S. Crystal Structure of  $\text{KTeO}(\text{OH})_5 \cdot \text{H}_2\text{O}$ . *Inorg. Chem.*, **1964**, *3*(5), 634-638.
- (9) Johansson, G. B.; Lindqvist, O.; Moret, J., Diammonium tellurium(VI) dioxide tetrahydroxide. *Acta Crystallogr B*. **1979**, *35* (7), 1684-1686.

- (10) He, H.; Li, Y.; Albrecht, R.; Ruck, M., Oxohydroxo-Tellurates(VI)  $K_2[TeO_2(OH)_4]$  and  $K_2[Fe_2TeO_6(OH)_2] \cdot 2H_2O$  from Alkaline Hydroflux. *Z. Anorg. Allg. Chem.* **2023**, *649* (22), e202300170.
- (11) Churakov, A. V.; Ustinova, E. A.; Prikhodchenko, P. V.; Tripol'skaya, T. A.; Howard, J. A. K., Synthesis and crystal structure of new alkali metal hydrogen tellurates. *Russ. J. Inorg. Chem.* **2007**, *52* (10), 1503-1510.
- (12) Yun, G.; Hwang, Y.; Yun, H.; Do, J.; Jacobson, A. J., A Vanadium Tellurate,  $(NH_4)_2[VO_2]_2[TeO_4(OH)_2]$ , Containing Two Edge-Shared Square-Pyramidal  $VO_5$  Groups. *Inorg. Chem.* **2010**, *49* (1), 229-233.
- (12) Eftenger, H.; Tillmanns, E., The crystal structure of  $K_2\{Cu[TeO_4(OH)_2]\} \cdot H_2O$ . *Z. Krist.-Cryst. Mater.* **1993**, *205* (1-2), 41-54.
- (13) Lindqvist O, Lundgren G. The crystal structure of potassium tellurate (VI). *Acta Chem. Scand.* **1966**, *20*: 2138-2155.
- (14) Lindqvist O. A redetermination of the crystal structure of  $KTeO_3(OH)$ . *Acta Chem. Scand.* **1972**, *26*: 4109-4120.
- (15) Levason, W.; Spicer, M. D.; Webster, M., Co-ordination chemistry of higher oxidation states. Part 26. Spectroscopic studies of tellurate complexes of the trivalent Group 1B metals. X-Ray structure of  $Na_5[Cu\{TeO_4(OH)_2\}_2] \cdot 16H_2O$ . *J. Chem. Soc. Dalton.* **1988**, (5), 1377-1381.
- (16) Hector, A. L.; Hill, N. J.; Levason, W.; Webster, M., X-Ray Crystal Structures of Hexa-oxotellurate Complexes of Ruthenium(VI) and Silver(III):  $Na_6[RuO_2\{TeO_4(OH)_2\}_2] \cdot 16H_2O$  and  $Na_5[Ag\{TeO_4(OH)_2\}_2] \cdot 16H_2O$ . *Z. Anorg. Allg. Chem.* **2002**, *628* (4), 815-818.
- (17) Levason, W.; Webster, M., Pentasodium Bis[dihydroxytetraoxotellurium(VI)]gold(III) Hexadecahydrate. *Acta Crystallogr C.* **1998**, *54* (12), 1729-1731.
- (18) An, Y.; Mosbah, A.; Le Gal La Salle, A.; Guyomard, D.; Verbaere, A.; Piffard, Y.,  $K_2[Te_4O_8(OH)_{10}]$ : synthesis, crystal structure and thermal behavior. *Solid State Sci.* **2001**, *3* (1), 93-101.
- (19) Benmiloud, L.; Moret, J.; Maurin, M.; Philippot, E., Structure d'un tellurate d'ammonium:  $NH_4TeO_3(OH)$ . *Acta Crystallogr B.* **1980**, *36* (1), 139-141.
- (20) Lindqvist, O., Lundgren, G., Mark, W., Lundström, H., Borch, G., & Craig, J. C. The Crystal Structure of the Tellurate  $Na_2K_4[Te_2O_8(OH)_2](H_2O)_{14}$ . *Acta Chem. Scand.* **1969**, *23*: 3062-3070.
- (21) Philippot, E. T. I. E. N. N. E., Benmiloud, L. E. I. L. A., Maurin, M., & Moret, J. Pentacoordination de l'atome de tellure (IV) par les atomes d'oxygène. Etude cristallographique d'un oxotellurate mixte:  $NH_4 [Te^{IV}Te^{VI}O_5(OH)]$ . *Acta Crystallogr., Sect. B: Struct. Crystallogr. Cryst. Chem.* **1979**, *35*(9), 1986-1989.
- (22) Minimol, M. P., & Vidyasagar, K. Hydrothermal synthesis and characterization of new one-dimensional tellurates,  $A_2[Te_3O_8(OH)_4]$  (A = Cs, Rb, K, Na). *Indian Journal of Chemistry - Section A*, **2003**, *42*(A), 2244-2249.
- (23) Puder, A.; Fuchs, J.; Lentz, D.; Roth, K., Das erste cyclische Isopolyoxoanion aus Oktaederbausteinen. Synthese und Strukturbestimmung von Kaliumhexatellurat(VI)  $K_8Te_6O_{17}(OH)_{10} \cdot 1/2 KOH \cdot 6H_2O$ . *Z. Naturforsch. B.* **1995**, *50* (1), 91-93.
